# Supplementary material
Source: Royal Society of Chemistry journal article supplement (doi:10.1039/d5nj04894j)
Supplement: d5nj04894j1.pdf [file d5nj04894j1.pdf]

## Supplementary Information

### Insights into the promotion mechanism of multiple electrophilic sites in CO<sub>2</sub> cycloaddition via simulation and experiment

Wensheng Wei<sup>a,b</sup>, Chunyang Zeng<sup>c,\*</sup>, Shengli Wang<sup>d,\*</sup>, Yuxin Wang<sup>b</sup>, Tiejun Yu<sup>d</sup>, Xin Ma<sup>b</sup>, Guangwen Xu<sup>a,b</sup>, Jingtang Zhao<sup>b,\*</sup>, Lei Shi<sup>a,b,d,\*</sup>

<sup>a</sup> School of Materials Science and Engineering, Shenyang University of Technology, Shenyang, 110870, China.

<sup>b</sup> Key Laboratory on Resources Chemicals and Materials of Ministry of Education, Shenyang University of Chemical Technology, Shenyang 110142, China.

<sup>c</sup> Petroleum and Chemical Industry Federation, Beijing 100723, China.

<sup>d</sup> Hengli Petrochemical (Dalian) New Materials Technology Co., Ltd., Dalian, 116300, China.

\* Corresponding author

E-mail addresses: [shilei@syuct.edu.cn](mailto:shilei@syuct.edu.cn) (Lei Shi)

[jgzhaos@syuct.edu.cn](mailto:jgzhaos@syuct.edu.cn) (Jingtang Zhao)

[zengcy@cpcif.org.cn](mailto:zengcy@cpcif.org.cn) (Chunyang Zeng)

[wangshengli@hengli.com](mailto:wangshengli@hengli.com) (Shengli Wang)

## Characterization instrument

Fourier transform infrared (FT-IR) spectra of the samples were performed at room temperature using an IRT Racer-100 with KBr as the standard. Thermogravimetric and Differential Thermal Analysis (TG-DTA) tests were carried out using a TG-DTA8122 thermal analyzer in an N<sub>2</sub> atmosphere with a heating rate of 10 °C/min (25 to 600 °C). The <sup>13</sup>C NMR spectra were determined using a Bruker Avance III-500 MHz spectrometer. Inductively coupled plasma optical emission spectroscopy (ICP-OES) was performed on Optima 5300DV (Pekin-Elmer). X-ray photoelectron spectroscopy (XPS) analysis was carried out on a Thermo Scientific Nexsa spectrometer, and the C 1s peak was at 284.5 eV. Scanning electron microscopy (SEM) images and energy dispersive spectroscopy (EDS) mapping images of the as-synthesized catalyst were investigated using a JSM-IT800 field emission electron microscope with an acceleration voltage of 0.01-30 kV. The strength and content of acid/base sites on the catalyst were determined by performing temperature programmed desorption of ammonia (NH<sub>3</sub>-TPD) and CO<sub>2</sub> (CO<sub>2</sub>-TPD) using a BeL-II. After the catalyst was pretreated at 50 °C in a helium atmosphere for 60 min, the catalyst was then adsorbed with 10% NH<sub>3</sub>/He (or 10% CO<sub>2</sub>/He) at 50 °C for 60 min. The samples were then purged in a He atmosphere at 50 °C for 60 min and desorbed from 50 to 200°C with a heating rate of 5 °C/min, followed by a 1 h hold to finish desorption. The product yield and selectivity were determined using a Gas Chromatograph (GC-2010) equipped with an FID detector and an HP-FFAP capillary column (30 m × 0.53 mm). The DFT calculation details are presented in the Supplementary Material.

## Computation details

All structures were optimized and characterized in ideal gas phase model at B3LYP <sup>[1]</sup>-D3 <sup>[2]</sup>/BSI level, BSI representing a basis set with SDD <sup>[3]</sup> for Sn, Br, MWB46 for Sn and 6-31G(d,p) for C, H, O, N and Sn atoms. Harmonic frequency analysis calculations at the same level were performed to verify the optimized geometries to be minima (no imaginary frequency) or transition states (TSS, having unique one imaginary frequency). The energies were further improved by M06 <sup>[4]</sup>/BSII//B3LYP-D3/BSI single-point calculations, BSII denotes a basis set with SDD

for Sn, Br, MWB46 for Sn and 6-311++G(d,p) for C, H, O, N and Sn atoms. When necessary, intrinsic reaction coordinate (IRC) calculations <sup>[5]</sup> were carried out at the B3LYP-D3/BSI level to verify a TS correctly connecting with its nearby minima. All DFT calculations were carried out using Gaussian 09 program <sup>[6]</sup>. Selected computed structures are illustrated using the CYLview <sup>[7]</sup>.

## 1. Supporting Figures

**Fig. S1.** The most commonly proposed mechanism for the formation of cyclic carbonates from CO<sub>2</sub> and epoxides

**Fig. S2.** The rate-determining step in the cycloaddition reaction process of PO and CO<sub>2</sub>

**Fig. S3.** Recyclability studies for the cycloaddition of CO<sub>2</sub> and PO catalyzed by [EIMBr-COO]<sub>2</sub>Sn (Weakened reaction condition)

**Fig. S4.** <sup>1</sup>H NMR spectrum of recycled [EIMBr-COO]<sub>2</sub>Sn

**Fig. S5.** <sup>13</sup>C NMR spectrum of recycled [EIMBr-COO]<sub>2</sub>Sn

**Fig. S6.** TG curves of fresh and recycled [EIMBr-COO]<sub>2</sub>Sn

**Fig. S7.** Catalytic performance of [EIMBr-COO]<sub>2</sub>Sn for the cycloaddition of CO<sub>2</sub> with various epoxides.

## 2. Supporting Tables

**Table S1** Comparison of the activation energies of PO and CO<sub>2</sub> reactions catalyzed by different catalysts

**Table S2** Calculation atomic coordinates of [ECOHHIM]Br

**Table S3** Calculation atomic coordinates of [EIMBr-COO]<sub>2</sub>Sn

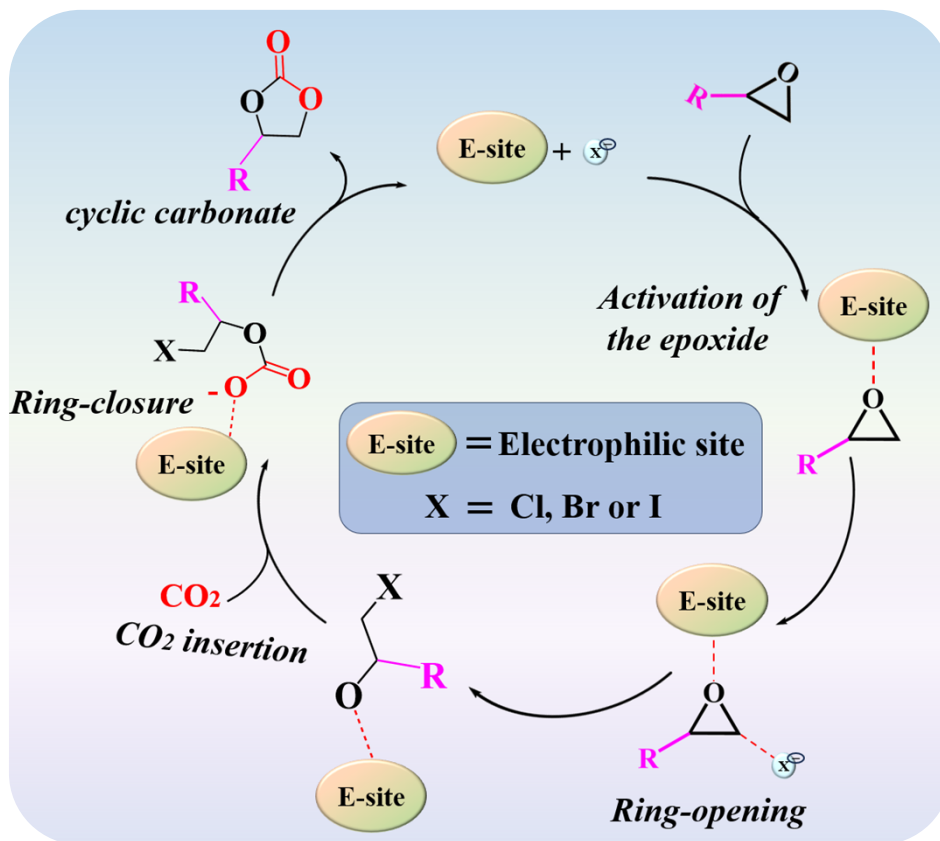

**Fig. S1.** The most commonly proposed mechanism for the formation of cyclic carbonates from CO<sub>2</sub> and epoxides.

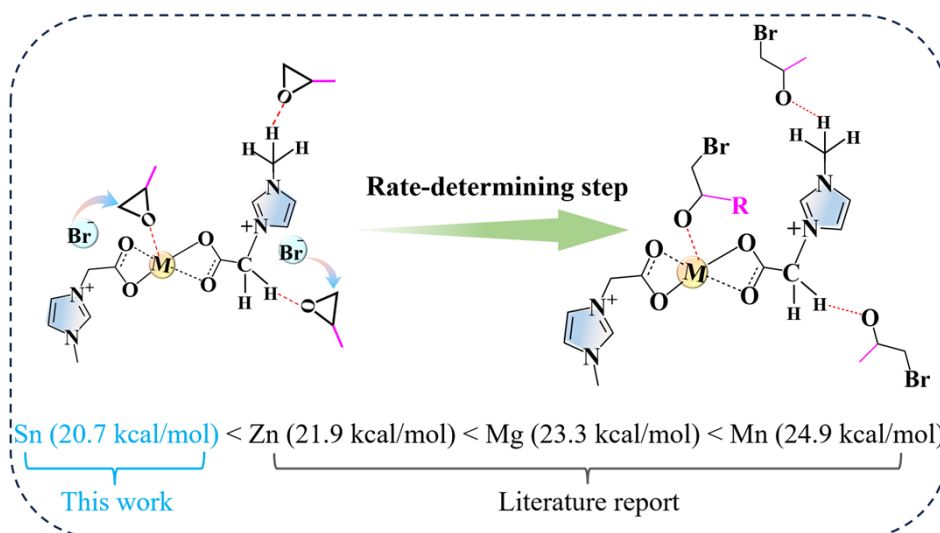

**Fig. S2.** The rate-determining step in the cycloaddition reaction process of PO and CO<sub>2</sub>

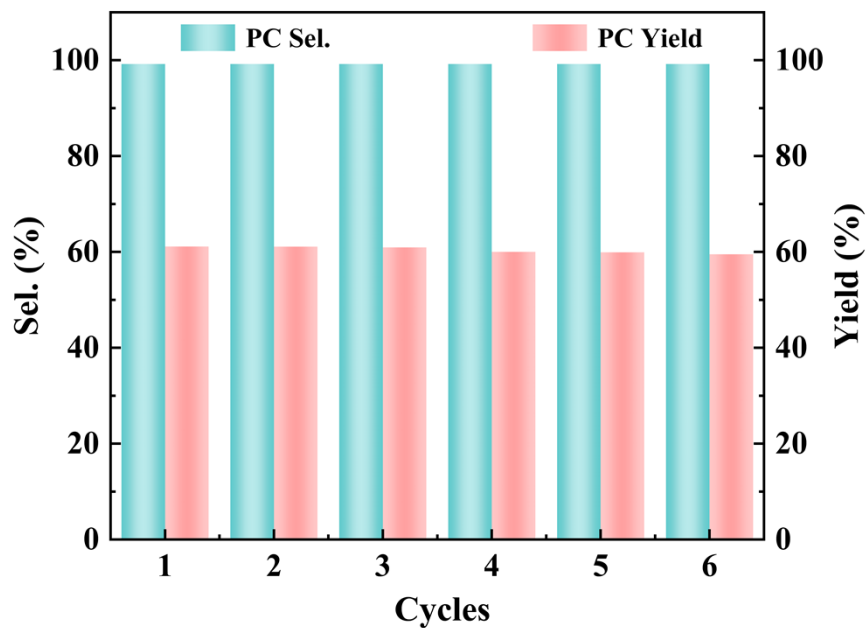

**Fig. S3.** Recyclability studies for the cycloaddition of CO<sub>2</sub> and PO catalyzed by [EIMBr-COO]<sub>2</sub>Sn (Weakened reaction condition: 0.14 mol PO, 4.76×10<sup>-4</sup> mol catalyst, 2.4 MPa CO<sub>2</sub>, 90 °C, 2 h).

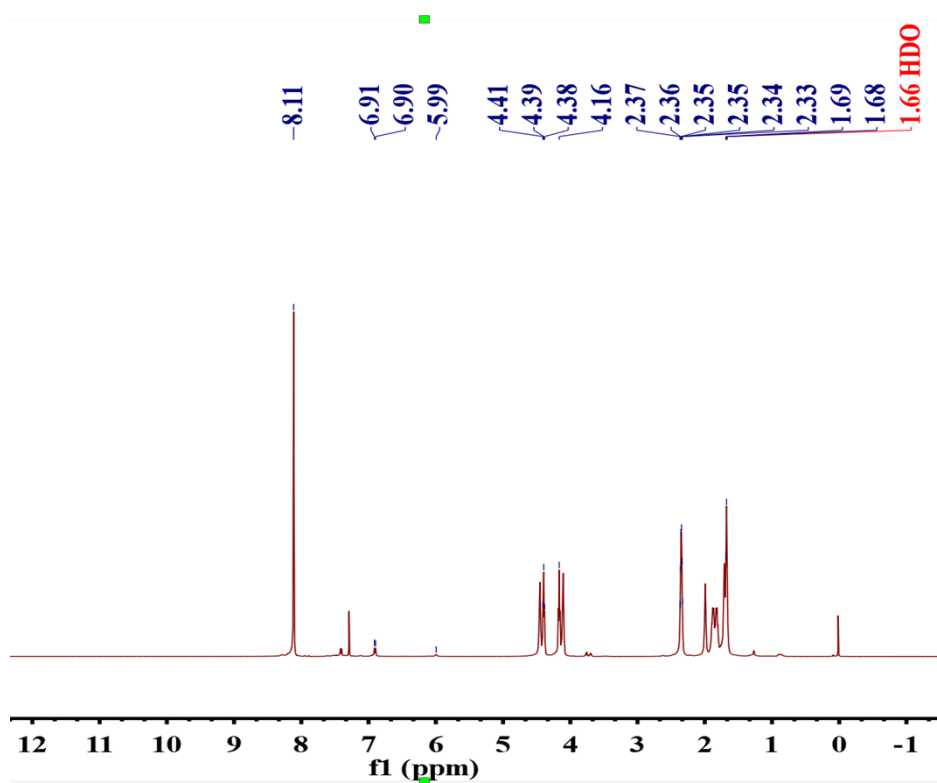

**Fig. S4.** <sup>1</sup>H NMR spectrum of recycled [EIMBr-COO]<sub>2</sub>Sn

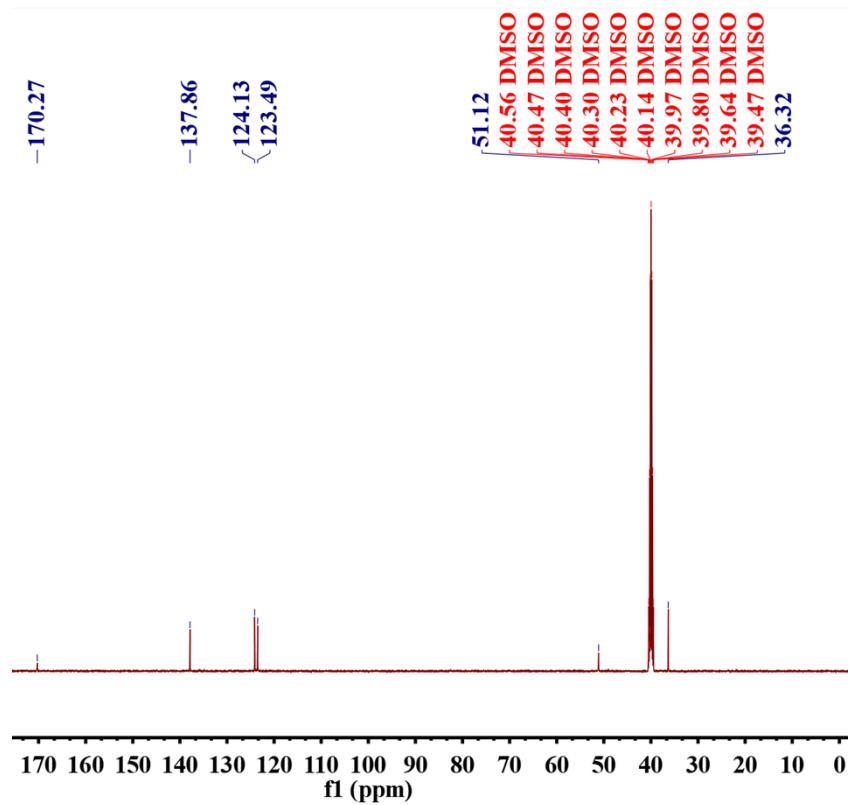

Fig. S5.  $^{13}\text{C}$  NMR spectrum of recycled  $[\text{EIMBr-COO}]_2\text{Sn}$

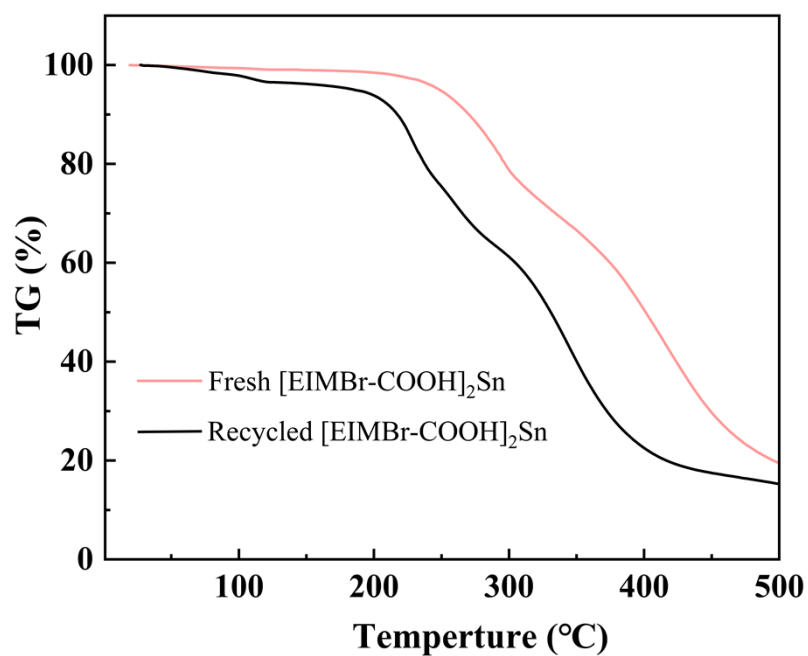

Fig. S6. TG curves of fresh and recycled  $[\text{EIMBr-COOH}]_2\text{Sn}$

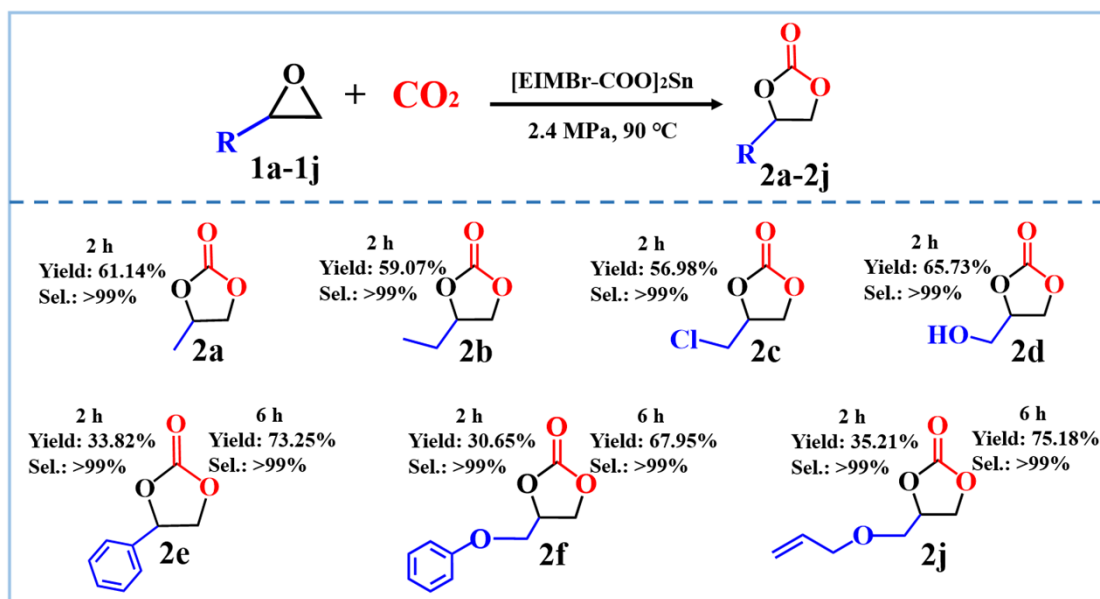

**Fig. S7.** Catalytic performance of [EIMBr-COO]<sub>2</sub>Sn for the cycloaddition of CO<sub>2</sub> with various epoxides. Weakened reaction condition: epoxides (0.14 mol), [EIMBr-COO]<sub>2</sub>Sn (4.76×10<sup>-4</sup> mol), 90 °C, 2.4 MPa CO<sub>2</sub>.

**Table S1** Comparison of the activation energies of PO and CO<sub>2</sub> reactions catalyzed by different catalysts.

| Entry | Catalyst                                        | <i>E<sub>a</sub></i> kJ/mol | Ref.      |
|-------|-------------------------------------------------|-----------------------------|-----------|
| 1     | DTAB-IL                                         | 43.93                       | [8]       |
| 2     | PAN-PD-BrOH                                     | 30.26                       | [9]       |
| 3     | PIL-DVB-IV                                      | 77.74                       | [10]      |
| 4     | Zn-NPClH                                        | 30.80                       | [11]      |
| 5     | [bmim]Br                                        | 57.40                       | [12]      |
| 6     | [P <sub>4,4,4,2</sub> NH <sub>2</sub> ][Br]-DEG | 56.23                       | [13]      |
| 7     | Mim/ZnBr <sub>2</sub>                           | 41.10                       | [14]      |
| 8     | Multi-hydroxyl ILs                              | 37.20                       | [15]      |
| 9     | [EIMBr-COO] <sub>2</sub> Sn                     | 26.23                       | This work |

**Table S2** Calculation atomic coordinates of [ECOOHIM]Br

| [ECOOHIM]Br | q(N)    | q(N+1)  | q(N-1) | f <sup>-</sup> | f <sup>+</sup> | Δf      |
|-------------|---------|---------|--------|----------------|----------------|---------|
| 1(C)        | -0.0067 | -0.0551 | 0.0527 | 0.0593         | 0.0484         | -0.0109 |
| 2(C)        | -0.0051 | -0.0392 | 0.0551 | 0.0602         | 0.0341         | -0.0261 |
| 3(C)        | 0.1006  | -0.0079 | 0.11   | 0.0094         | 0.1085         | 0.0991  |
| 4(N)        | 0.0067  | -0.0447 | 0.0435 | 0.0369         | 0.0513         | 0.0145  |

|        |         |         |         |        |        |         |
|--------|---------|---------|---------|--------|--------|---------|
| 5(H)   | 0.0721  | 0.0375  | 0.1041  | 0.032  | 0.0346 | 0.0026  |
| 6(H)   | 0.066   | 0.0428  | 0.0944  | 0.0284 | 0.0233 | -0.0051 |
| 7(H)   | 0.0772  | 0.0307  | 0.0989  | 0.0217 | 0.0465 | 0.0247  |
| 8(N)   | 0.0025  | -0.0365 | 0.0386  | 0.0361 | 0.039  | 0.0029  |
| 9(C)   | -0.0109 | -0.0364 | 0.0058  | 0.0167 | 0.0255 | 0.0089  |
| 10(H)  | 0.0459  | 0.0235  | 0.0567  | 0.0108 | 0.0225 | 0.0117  |
| 11(H)  | 0.0508  | 0.0216  | 0.0735  | 0.0228 | 0.0292 | 0.0064  |
| 12(H)  | 0.0527  | 0.0266  | 0.0765  | 0.0238 | 0.0262 | 0.0024  |
| 13(C)  | 0.0151  | -0.0154 | 0.0238  | 0.0088 | 0.0305 | 0.0217  |
| 14(H)  | 0.0531  | 0.0123  | 0.0606  | 0.0075 | 0.0409 | 0.0334  |
| 15(H)  | 0.0633  | 0.0167  | 0.0774  | 0.0141 | 0.0465 | 0.0325  |
| 16(C)  | 0.2214  | 0.1408  | 0.2273  | 0.0058 | 0.0806 | 0.0748  |
| 17(O)  | -0.2607 | -0.3471 | -0.239  | 0.0218 | 0.0864 | 0.0646  |
| 18(Br) | -0.5751 | -0.7171 | -0.0254 | 0.5498 | 0.142  | -0.4077 |
| 19(O)  | -0.1649 | -0.2158 | -0.1477 | 0.0172 | 0.0509 | 0.0337  |
| 20(H)  | 0.196   | 0.1629  | 0.213   | 0.017  | 0.0332 | 0.0161  |

**Table S3** Calculation atomic coordinates of [EIMBr-COO]<sub>2</sub>Sn

| [EIMBr-COO] <sub>2</sub> Sn | q(N)    | q(N+1)  | q(N-1)  | f <sup>-</sup> | f <sup>+</sup> | Δf      |
|-----------------------------|---------|---------|---------|----------------|----------------|---------|
| 1(C)                        | 0.0067  | -0.0017 | 0.0158  | 0.0084         | 0.0090         | -0.0006 |
| 2(C)                        | -0.0062 | -0.0067 | 0.0170  | 0.0005         | 0.0233         | -0.0227 |
| 3(C)                        | 0.0889  | 0.0842  | 0.1047  | 0.0046         | 0.0158         | -0.0112 |
| 4(N)                        | 0.0323  | 0.0318  | 0.0346  | 0.0005         | 0.0023         | -0.0018 |
| 5(H)                        | 0.0699  | 0.0599  | 0.0872  | 0.0100         | 0.0173         | -0.0072 |
| 6(H)                        | 0.0688  | 0.0656  | 0.0843  | 0.0032         | 0.0155         | -0.0123 |
| 7(H)                        | 0.0436  | 0.0467  | 0.0734  | -0.0031        | 0.0298         | -0.0328 |
| 8(N)                        | 0.0208  | 0.0203  | 0.0318  | 0.0005         | 0.0110         | -0.0106 |
| 9(C)                        | -0.0137 | -0.0226 | 0.0007  | 0.0089         | 0.0144         | -0.0055 |
| 10(H)                       | 0.0565  | 0.0363  | 0.0666  | 0.0203         | 0.0101         | 0.0101  |
| 11(H)                       | 0.0530  | 0.0448  | 0.0644  | 0.0082         | 0.0114         | -0.0032 |
| 12(H)                       | 0.0330  | 0.0320  | 0.0543  | 0.0009         | 0.0213         | -0.0204 |
| 13(C)                       | 0.0214  | 0.0082  | 0.0243  | 0.0132         | 0.0029         | 0.0104  |
| 14(H)                       | 0.0524  | 0.0563  | 0.0614  | -0.0039        | 0.0090         | -0.0128 |
| 15(H)                       | 0.0652  | 0.0521  | 0.0721  | 0.0131         | 0.0069         | 0.0061  |
| 16(C)                       | 0.2028  | 0.1754  | 0.1985  | 0.0274         | -0.0042        | 0.0316  |
| 17(O)                       | -0.2650 | -0.2972 | -0.2607 | 0.0322         | 0.0042         | 0.0280  |
| 18(O)                       | -0.2504 | -0.2928 | -0.2597 | 0.0425         | -0.0094        | 0.0518  |
| 19(C)                       | 0.0033  | -0.0073 | 0.0158  | 0.0106         | 0.0124         | -0.0019 |
| 20(C)                       | -0.0017 | -0.0069 | 0.0170  | 0.0052         | 0.0187         | -0.0135 |
| 21(C)                       | 0.0952  | 0.0840  | 0.1047  | 0.0113         | 0.0095         | 0.0018  |
| 22(N)                       | 0.0234  | 0.0283  | 0.0345  | -0.0049        | 0.0111         | -0.0160 |
| 23(H)                       | 0.0611  | 0.0516  | 0.0872  | 0.0094         | 0.0261         | -0.0167 |

|        |         |         |         |         |         |         |
|--------|---------|---------|---------|---------|---------|---------|
| 24(H)  | 0.0527  | 0.0547  | 0.0843  | -0.0020 | 0.0316  | -0.0337 |
| 25(H)  | 0.0808  | 0.0542  | 0.0732  | 0.0266  | -0.0076 | 0.0342  |
| 26(N)  | 0.0164  | 0.0244  | 0.0318  | -0.0080 | 0.0154  | -0.0234 |
| 27(C)  | -0.0046 | -0.0204 | 0.0008  | 0.0157  | 0.0054  | 0.0103  |
| 28(H)  | 0.0569  | 0.0451  | 0.0666  | 0.0118  | 0.0097  | 0.0021  |
| 29(H)  | 0.0610  | 0.0364  | 0.0644  | 0.0246  | 0.0035  | 0.0211  |
| 30(H)  | 0.0503  | 0.0374  | 0.0543  | 0.0129  | 0.0040  | 0.0088  |
| 31(C)  | 0.0200  | 0.0047  | 0.0243  | 0.0153  | 0.0043  | 0.0109  |
| 32(H)  | 0.0505  | 0.0468  | 0.0613  | 0.0037  | 0.0108  | -0.0072 |
| 33(H)  | 0.0700  | 0.0526  | 0.0721  | 0.0174  | 0.0021  | 0.0153  |
| 34(C)  | 0.2019  | 0.1785  | 0.1986  | 0.0234  | -0.0033 | 0.0267  |
| 35(O)  | -0.2515 | -0.2896 | -0.2607 | 0.0381  | -0.0093 | 0.0473  |
| 36(O)  | -0.2710 | -0.3222 | -0.2598 | 0.0512  | 0.0112  | 0.0400  |
| 37(Br) | -0.6006 | -0.6652 | -0.2909 | 0.0647  | 0.3096  | -0.2450 |
| 38(Br) | -0.6235 | -0.6557 | -0.2907 | 0.0321  | 0.3328  | -0.3007 |
| 39(Sn) | 0.6295  | 0.1761  | 0.6405  | 0.4534  | 0.0110  | 0.4425  |

**Cartesian Coordinates in Å, SCF Energies and Free Energies (in a.u.) at 298.15 K  
and 1 atm for the Optimized Structures [BSI= 6-31G(d,p), BSII=6-311++G(d,p)]**

**Cat-Sn**

B3LYP-D3/BSI SCF energy in gas: -1017.153197 a.u.

M06/BSII SCF energy in gas: -1016.675417 a.u.

M06/BSII free energy in gas: -1016.444153 a.u.

|   |             |             |            |
|---|-------------|-------------|------------|
| C | 1.36310600  | -0.07198900 | 2.76092400 |
| C | 0.01230300  | 0.10142500  | 2.72642200 |
| C | 0.95786900  | 1.83686500  | 1.70479400 |
| N | 1.92769900  | 1.02431700  | 2.12745900 |
| H | 1.96897200  | -0.89129300 | 3.11357700 |
| H | -0.79478900 | -0.52248900 | 3.06693600 |
| H | 1.06381600  | 2.72367600  | 1.07206800 |
| N | -0.22214000 | 1.29598400  | 2.05050900 |
| C | 3.35925900  | 1.24637600  | 1.90896900 |
| H | 3.47465100  | 2.08050100  | 1.21613900 |
| H | 3.84186800  | 1.48605100  | 2.85909400 |
| H | 3.78205700  | 0.32941700  | 1.48986900 |
| C | -1.50731900 | 1.91761000  | 1.70745200 |
| H | -1.30444100 | 2.75237400  | 1.02824000 |

|    |             |             |             |
|----|-------------|-------------|-------------|
| H  | -1.99373600 | 2.28483600  | 2.61737600  |
| C  | -2.44459200 | 0.94245200  | 1.01057800  |
| O  | -2.52225400 | -0.26818400 | 1.43789400  |
| O  | -3.12519200 | 1.30957100  | 0.02444000  |
| C  | 2.06494000  | 0.71472000  | -1.86150600 |
| C  | 0.87662300  | 0.18705500  | -1.46372300 |
| C  | 2.25153300  | -1.48841100 | -1.93706800 |
| N  | 2.90329400  | -0.34612900 | -2.17329600 |
| H  | 2.33848500  | 1.75416000  | -1.96327200 |
| H  | -0.03694700 | 0.69247600  | -1.20782900 |
| H  | 2.66708400  | -2.47714700 | -2.02756700 |
| N  | 0.99897100  | -1.19886200 | -1.54899500 |
| C  | 4.34190900  | -0.26763700 | -2.41660000 |
| H  | 4.62464600  | -0.97650200 | -3.19675700 |
| H  | 4.58718800  | 0.74320800  | -2.74200300 |
| H  | 4.86309600  | -0.51466500 | -1.48670000 |
| C  | 0.16432200  | -2.21942500 | -0.91524100 |
| H  | 0.56204700  | -2.39765800 | 0.09281000  |
| H  | 0.26585100  | -3.15802200 | -1.46674000 |
| C  | -1.30659700 | -1.88879800 | -0.80578400 |
| O  | -1.79287700 | -0.84160500 | -1.36392200 |
| O  | -2.03473700 | -2.63924400 | -0.10987700 |
| Br | 3.36037100  | -2.23243700 | 0.81420900  |
| Br | 0.44731400  | 3.73305600  | -0.95776300 |
| Sn | -3.74866500 | -0.96807000 | -0.30108400 |

### 1a

B3LYP-D3/BSI SCF energy in gas: -193.1173659 a.u.

M06/BSII SCF energy in gas: -193.0331465 a.u.

M06/BSII free energy in gas: -192.9738755 a.u.

|   |             |             |             |
|---|-------------|-------------|-------------|
| C | -0.15151400 | -0.04047400 | 0.49121500  |
| C | 1.04341600  | 0.61582000  | -0.06025800 |
| H | -0.15703000 | -0.25614800 | 1.56301100  |
| H | 1.87322200  | 0.88381800  | 0.59523800  |
| H | 0.94944300  | 1.22676500  | -0.95966600 |
| C | -1.50953600 | 0.10094900  | -0.14909200 |
| H | -2.08045600 | -0.82836200 | -0.05120100 |
| H | -2.08211000 | 0.90317900  | 0.32957500  |
| H | -1.40790200 | 0.32851000  | -1.21412700 |
| O | 0.82632900  | -0.78944200 | -0.24425200 |

### IM1-Sn

B3LYP-D3/BSI SCF energy in gas: -1210.301438 a.u.

M06/BSII SCF energy in gas: -1209.746597 a.u.

M06/BSII free energy in gas: -1209.438285 a.u.

|   |            |             |            |
|---|------------|-------------|------------|
| C | 5.11198100 | -2.01775000 | 0.29391600 |
| C | 4.02848400 | -2.67639000 | 0.79349900 |
| C | 3.43073100 | -0.57887600 | 0.39586500 |

|    |             |             |             |
|----|-------------|-------------|-------------|
| N  | 4.71615700  | -0.71269700 | 0.04656400  |
| H  | 6.11162000  | -2.35971500 | 0.08037500  |
| H  | 3.87816000  | -3.70892400 | 1.05613500  |
| H  | 2.85800000  | 0.34249900  | 0.27110200  |
| N  | 2.99657500  | -1.75740900 | 0.86173900  |
| C  | 5.54975900  | 0.35689400  | -0.51321000 |
| H  | 6.34378000  | 0.60849800  | 0.19357100  |
| H  | 5.98643000  | 0.01233900  | -1.45273900 |
| H  | 4.91694500  | 1.22906800  | -0.69687800 |
| C  | 1.61302700  | -2.04606900 | 1.24469000  |
| H  | 1.03766000  | -1.12135000 | 1.19778900  |
| H  | 1.59334100  | -2.41259300 | 2.27528600  |
| C  | 0.97348600  | -3.12337000 | 0.32098700  |
| O  | 1.71082700  | -3.83019300 | -0.35945300 |
| O  | -0.30855800 | -3.17254400 | 0.40938700  |
| C  | 0.29099100  | 3.90523800  | 1.51054600  |
| C  | 0.13713900  | 3.02262800  | 2.53525100  |
| C  | -1.32570100 | 2.49565600  | 0.95393000  |
| N  | -0.64017500 | 3.56613400  | 0.54643100  |
| H  | 1.00542600  | 4.69586100  | 1.35733700  |
| H  | 0.66261000  | 2.92675400  | 3.47104200  |
| H  | -2.10013700 | 1.97702500  | 0.38616300  |
| N  | -0.87175100 | 2.14600300  | 2.16631000  |
| C  | -0.75941600 | 4.18082700  | -0.77788600 |
| H  | -1.59024500 | 3.70961500  | -1.30348100 |
| H  | -0.95181100 | 5.24948800  | -0.66456600 |
| H  | 0.17799900  | 4.00811700  | -1.31318900 |
| C  | -1.37762800 | 1.01778400  | 2.94780400  |
| H  | -2.32986100 | 1.27793500  | 3.41470400  |
| H  | -0.65651000 | 0.80675000  | 3.74126100  |
| C  | -1.60071000 | -0.26204300 | 2.12154400  |
| O  | -1.00913400 | -0.32848500 | 0.97582800  |
| O  | -2.33983000 | -1.12799900 | 2.59104400  |
| Sn | -2.12130900 | -1.96450600 | -0.10982300 |
| Br | -3.61582200 | 0.60026900  | -0.88768500 |
| Br | 2.46659300  | 2.51389000  | -0.71202200 |
| C  | -0.00900200 | 0.07346900  | -2.00301500 |
| C  | 0.60526700  | -1.21616700 | -2.34713700 |
| H  | 0.21342700  | 0.48167800  | -1.02104900 |
| H  | 1.28222300  | -1.72289000 | -1.66733000 |
| H  | 0.72150800  | -1.48670500 | -3.39470900 |
| C  | -0.45194700 | 1.05936100  | -3.04245000 |
| H  | -1.39040600 | 1.52347800  | -2.72890900 |
| H  | 0.32392400  | 1.82446700  | -3.14622500 |
| H  | -0.61571200 | 0.56936500  | -4.00610800 |
| O  | -0.79009400 | -1.17108300 | -1.93205700 |

### TS1-Sn

B3LYP-D3/BSI SCF energy in gas: -1210.272788 a.u.

M06/BSII SCF energy in gas: -1209.705958 a.u.

M06/BSII free energy in gas: -1209.397023 a.u.

|    |             |             |             |
|----|-------------|-------------|-------------|
| C  | -6.03766800 | 0.44867600  | 0.74708200  |
| C  | -5.13979200 | 1.22030600  | 1.42342400  |
| C  | -4.07924200 | -0.57924200 | 0.69883500  |
| N  | -5.35058100 | -0.66842600 | 0.30008800  |
| H  | -7.08638400 | 0.59445200  | 0.54476300  |
| H  | -5.25181100 | 2.17765200  | 1.90576100  |
| H  | -3.29435700 | -1.28658000 | 0.42691300  |
| N  | -3.93180300 | 0.54910300  | 1.40234400  |
| C  | -5.88910000 | -1.77229400 | -0.50271600 |
| H  | -6.57421800 | -2.37073500 | 0.10145300  |
| H  | -6.41581400 | -1.36054700 | -1.36522000 |
| H  | -5.05359200 | -2.38712000 | -0.84411800 |
| C  | -2.62103800 | 1.09101900  | 1.75387200  |
| H  | -1.99015600 | 0.28244900  | 2.12599300  |
| H  | -2.73727600 | 1.83347700  | 2.54574100  |
| C  | -1.95522500 | 1.72621700  | 0.50436000  |
| O  | -2.62930500 | 1.91530100  | -0.50628900 |
| O  | -0.70624100 | 1.95463400  | 0.69528700  |
| C  | 0.40094700  | -1.67362600 | 2.18275400  |
| C  | 0.89706300  | -0.44277300 | 2.49824500  |
| C  | 2.44427800  | -1.51900100 | 1.32722200  |
| N  | 1.38398800  | -2.32664800 | 1.45426500  |
| H  | -0.54729800 | -2.14073400 | 2.39343800  |
| H  | 0.46065500  | 0.39637000  | 3.01476600  |
| H  | 3.38369600  | -1.69893500 | 0.76857100  |
| N  | 2.17105600  | -0.37259400 | 1.95995900  |
| C  | 1.29428500  | -3.67891200 | 0.89750800  |
| H  | 2.18298300  | -3.85662200 | 0.29171500  |
| H  | 1.25333900  | -4.40868800 | 1.70946500  |
| H  | 0.39790400  | -3.75048500 | 0.27757800  |
| C  | 3.03372100  | 0.81948100  | 1.94343700  |
| H  | 3.97417500  | 0.52997200  | 1.45668800  |
| H  | 3.20934900  | 1.15202300  | 2.96670700  |
| C  | 2.34442800  | 1.92886800  | 1.13638700  |
| O  | 1.97163700  | 1.51196600  | -0.04182300 |
| O  | 2.16325900  | 3.04558700  | 1.60379200  |
| Sn | 0.50741800  | 2.69596700  | -1.04066900 |
| Br | 5.29427600  | -1.23248600 | -0.28302700 |
| Br | -1.98331900 | -2.74329100 | -0.95743400 |
| C  | 0.31906300  | -0.41029400 | -1.43076800 |
| C  | -1.03565800 | -0.55036000 | -1.97923100 |
| H  | 0.34689100  | -0.30667000 | -0.34471900 |
| H  | -1.85518700 | -0.00628300 | -1.53680900 |
| H  | -1.14382400 | -0.88263100 | -3.00428200 |
| C  | 1.42296500  | -1.29156000 | -1.96444100 |
| H  | 2.39929700  | -0.93285300 | -1.62502600 |
| H  | 1.27891900  | -2.32001500 | -1.62156400 |
| H  | 1.40815200  | -1.28796200 | -3.05817800 |

|   |            |            |             |
|---|------------|------------|-------------|
| O | 0.21282300 | 0.84941800 | -2.11502600 |
|---|------------|------------|-------------|

### IM2-Sn

B3LYP-D3/BSI SCF energy in gas: -1210.313007 a.u.

M06/BSII SCF energy in gas: -1209.753489 a.u.

M06/BSII free energy in gas: -1209.441551 a.u.

|    |             |             |             |
|----|-------------|-------------|-------------|
| C  | -1.90642000 | 1.88356600  | -1.98671000 |
| C  | -1.12529400 | 1.20421100  | -2.87700200 |
| C  | 0.20117600  | 2.03917900  | -1.31603500 |
| N  | -1.05521200 | 2.39105900  | -1.01948200 |
| H  | -2.97832300 | 2.00565500  | -1.89858900 |
| H  | -1.37919900 | 0.62738500  | -3.75016700 |
| H  | 1.07267800  | 2.27246000  | -0.72205000 |
| N  | 0.18513200  | 1.32733400  | -2.45164700 |
| C  | -1.46675700 | 3.19840400  | 0.13805000  |
| H  | -1.61336300 | 4.23455000  | -0.17441500 |
| H  | -2.41040900 | 2.79290200  | 0.51400100  |
| H  | -0.68230500 | 3.14569000  | 0.89406100  |
| C  | 1.33410300  | 0.60177300  | -2.99666100 |
| H  | 2.24346900  | 1.15426200  | -2.76277500 |
| H  | 1.21604500  | 0.54123400  | -4.08086700 |
| C  | 1.36742000  | -0.82401800 | -2.37451300 |
| O  | 2.53597700  | -1.14385600 | -1.93989000 |
| O  | 0.31911600  | -1.46381000 | -2.33789300 |
| C  | -4.19054200 | -2.37868100 | 1.93487000  |
| C  | -2.86901100 | -2.05626900 | 1.98326700  |
| C  | -3.64809900 | -1.46778900 | -0.00205100 |
| N  | -4.65609700 | -2.02449500 | 0.67818500  |
| H  | -4.83310600 | -2.83801800 | 2.66783700  |
| H  | -2.11875600 | -2.21923300 | 2.73666900  |
| H  | -3.71406100 | -1.05439300 | -0.99226900 |
| N  | -2.54840500 | -1.49727900 | 0.75701800  |
| C  | -6.05438500 | -1.98333100 | 0.25118300  |
| H  | -6.40783900 | -0.95036100 | 0.32773000  |
| H  | -6.13111600 | -2.32379000 | -0.78279800 |
| H  | -6.63538800 | -2.64717600 | 0.89171500  |
| C  | -1.28672300 | -0.85619900 | 0.39635000  |
| H  | -1.25258800 | 0.13605200  | 0.85486200  |
| H  | -1.25193900 | -0.74013700 | -0.68853900 |
| C  | -0.05075100 | -1.67217500 | 0.79655800  |
| O  | -0.14586000 | -2.77926400 | 1.31177900  |
| O  | 1.03818100  | -1.03376200 | 0.48907200  |
| Br | -4.74575000 | 1.45330100  | 0.02757400  |
| Br | 2.32370400  | 2.97785300  | 1.62902000  |
| C  | 3.68634200  | 0.59840800  | 0.41212600  |
| C  | 3.08957500  | 1.05560200  | 1.74056600  |
| H  | 2.92206600  | 0.73505100  | -0.36846100 |
| H  | 2.22347500  | 0.45735200  | 2.00848200  |
| H  | 3.82307200  | 1.10546000  | 2.54386700  |

|    |            |             |             |
|----|------------|-------------|-------------|
| C  | 4.95088300 | 1.35088200  | 0.00927500  |
| H  | 5.32462400 | 0.94195000  | -0.93344300 |
| H  | 4.76600100 | 2.42255300  | -0.11328300 |
| H  | 5.72356900 | 1.20894300  | 0.77168700  |
| O  | 3.99020300 | -0.75950800 | 0.61620300  |
| Sn | 2.78594100 | -2.28389800 | -0.04884700 |

### CO<sub>2</sub>

B3LYP-D3/BSI SCF energy in gas: -188.5777604 a.u.

M06/BSII SCF energy in gas: -188.5583831 a.u.

M06/BSII free energy in gas: -188.5674851 a.u.

|   |            |            |             |
|---|------------|------------|-------------|
| C | 0.00000000 | 0.00000000 | 0.00000000  |
| O | 0.00000000 | 0.00000000 | 1.16976100  |
| O | 0.00000000 | 0.00000000 | -1.16976100 |

### TS2-Sn

B3LYP-D3/BSI SCF energy in gas: -1398.899742 a.u.

M06/BSII SCF energy in gas: -1398.310646 a.u.

M06/BSII free energy in gas: -1397.989931 a.u.

|   |             |             |             |
|---|-------------|-------------|-------------|
| C | 5.46326900  | 2.38335600  | -0.22759300 |
| C | 4.69206800  | 2.46751500  | -1.34709900 |
| C | 3.80254400  | 0.92976400  | -0.02464300 |
| N | 4.89291800  | 1.41527400  | 0.58170400  |
| H | 6.35460600  | 2.91570600  | 0.06183700  |
| H | 4.77956700  | 3.09022300  | -2.22244300 |
| H | 3.16273200  | 0.15916700  | 0.39517400  |
| N | 3.67041600  | 1.54555800  | -1.20722100 |
| C | 5.38207800  | 1.00272400  | 1.90255300  |
| H | 4.77662800  | 0.16198700  | 2.25041900  |
| H | 6.42701200  | 0.69786900  | 1.81649900  |
| H | 5.29372600  | 1.84129300  | 2.59670800  |
| C | 2.53295400  | 1.36154200  | -2.10850200 |
| H | 2.49292200  | 0.32620200  | -2.46114700 |
| H | 2.65867100  | 2.02244400  | -2.96679600 |
| C | 1.19055600  | 1.65475400  | -1.40292100 |
| O | 1.15040100  | 1.85639900  | -0.19977900 |
| O | 0.20236700  | 1.62723500  | -2.24957700 |
| C | -2.24169100 | -3.72093400 | 0.83818400  |
| C | -1.38017900 | -3.91080900 | -0.19752100 |
| C | -0.28370200 | -2.85120900 | 1.40759600  |
| N | -1.53629400 | -3.05845900 | 1.82924700  |
| H | -3.28867900 | -3.95074300 | 0.94206000  |
| H | -1.53540800 | -4.33833800 | -1.17390200 |
| H | 0.52411400  | -2.34727900 | 1.93778600  |
| N | -0.16149700 | -3.37893600 | 0.18315100  |
| C | -2.09245900 | -2.60037600 | 3.10158200  |
| H | -1.33894800 | -2.00731700 | 3.61938400  |
| H | -2.96590900 | -1.98170300 | 2.89008100  |

|    |             |             |             |
|----|-------------|-------------|-------------|
| H  | -2.37002200 | -3.45971700 | 3.71605900  |
| C  | 0.97974400  | -3.14408800 | -0.70329400 |
| H  | 1.13952900  | -4.02607500 | -1.32644700 |
| H  | 1.86692700  | -2.97548800 | -0.08482200 |
| C  | 0.76290900  | -1.91092900 | -1.60383800 |
| O  | -0.32831900 | -1.26739300 | -1.33892300 |
| O  | 1.61436900  | -1.65032600 | -2.44868600 |
| Sn | -1.37587800 | 0.18305600  | -2.56922500 |
| Br | 2.89835000  | -1.72683100 | 2.08613000  |
| Br | -2.77947900 | 3.53982400  | 2.25811000  |
| C  | -1.93703600 | 1.41973600  | 0.37005100  |
| C  | -3.20246400 | 2.08526900  | 0.90321800  |
| H  | -1.28067200 | 2.18166000  | -0.06036400 |
| H  | -3.74204900 | 2.59465800  | 0.10703300  |
| H  | -3.84958400 | 1.38391700  | 1.42446600  |
| C  | -1.14025200 | 0.63378600  | 1.40603600  |
| H  | -0.33390500 | 0.09940900  | 0.90365300  |
| H  | -0.69218400 | 1.31414300  | 2.13271500  |
| H  | -1.78587000 | -0.07430300 | 1.92718300  |
| O  | -2.39808300 | 0.58183800  | -0.70796300 |
| O  | -3.72973200 | -0.99347300 | 0.75261200  |
| C  | -3.37427900 | -0.97945700 | -0.38822700 |
| O  | -3.34137100 | -1.50718000 | -1.46693100 |

### IM3-Sn

B3LYP-D3/BSI SCF energy in gas: -1398.9058 a.u.

M06/BSII SCF energy in gas: -1398.318615 a.u.

M06/BSII free energy in gas: -1397.995593 a.u.

|   |             |             |             |
|---|-------------|-------------|-------------|
| C | 5.46326900  | 2.38335600  | -0.22759300 |
| C | 4.69206800  | 2.46751500  | -1.34709900 |
| C | 3.80254400  | 0.92976400  | -0.02464300 |
| N | 4.89291800  | 1.41527400  | 0.58170400  |
| H | 6.35460600  | 2.91570600  | 0.06183700  |
| H | 4.77956700  | 3.09022300  | -2.22244300 |
| H | 3.16273200  | 0.15916700  | 0.39517400  |
| N | 3.67041600  | 1.54555800  | -1.20722100 |
| C | 5.38207800  | 1.00272400  | 1.90255300  |
| H | 4.77662800  | 0.16198700  | 2.25041900  |
| H | 6.42701200  | 0.69786900  | 1.81649900  |
| H | 5.29372600  | 1.84129300  | 2.59670800  |
| C | 2.53295400  | 1.36154200  | -2.10850200 |
| H | 2.49292200  | 0.32620200  | -2.46114700 |
| H | 2.65867100  | 2.02244400  | -2.96679600 |
| C | 1.19055600  | 1.65475400  | -1.40292100 |
| O | 1.15040100  | 1.85639900  | -0.19977900 |
| O | 0.20236700  | 1.62723500  | -2.24957700 |
| C | -2.24169100 | -3.72093400 | 0.83818400  |
| C | -1.38017900 | -3.91080900 | -0.19752100 |
| C | -0.28370200 | -2.85120900 | 1.40759600  |

|    |             |             |             |
|----|-------------|-------------|-------------|
| N  | -1.53629400 | -3.05845900 | 1.82924700  |
| H  | -3.28867900 | -3.95074300 | 0.94206000  |
| H  | -1.53540800 | -4.33833800 | -1.17390200 |
| H  | 0.52411400  | -2.34727900 | 1.93778600  |
| N  | -0.16149700 | -3.37893600 | 0.18315100  |
| C  | -2.09245900 | -2.60037600 | 3.10158200  |
| H  | -1.33894800 | -2.00731700 | 3.61938400  |
| H  | -2.96590900 | -1.98170300 | 2.89008100  |
| H  | -2.37002200 | -3.45971700 | 3.71605900  |
| C  | 0.97974400  | -3.14408800 | -0.70329400 |
| H  | 1.13952900  | -4.02607500 | -1.32644700 |
| H  | 1.86692700  | -2.97548800 | -0.08482200 |
| C  | 0.76290900  | -1.91092900 | -1.60383800 |
| O  | -0.32831900 | -1.26739300 | -1.33892300 |
| O  | 1.61436900  | -1.65032600 | -2.44868600 |
| Sn | -1.37587800 | 0.18305600  | -2.56922500 |
| Br | 2.89835000  | -1.72683100 | 2.08613000  |
| Br | -2.77947900 | 3.53982400  | 2.25811000  |
| C  | -1.93703600 | 1.41973600  | 0.37005100  |
| C  | -3.20246400 | 2.08526900  | 0.90321800  |
| H  | -1.28067200 | 2.18166000  | -0.06036400 |
| H  | -3.74204900 | 2.59465800  | 0.10703300  |
| H  | -3.84958400 | 1.38391700  | 1.42446600  |
| C  | -1.14025200 | 0.63378600  | 1.40603600  |
| H  | -0.33390500 | 0.09940900  | 0.90365300  |
| H  | -0.69218400 | 1.31414300  | 2.13271500  |
| H  | -1.78587000 | -0.07430300 | 1.92718300  |
| O  | -2.39808300 | 0.58183800  | -0.70796300 |
| O  | -3.72973200 | -0.99347300 | 0.75261200  |
| C  | -3.37427900 | -0.97945700 | -0.38822700 |
| O  | -3.34137100 | -1.50718000 | -1.46693100 |

### TS3-Sn

B3LYP-D3/BSI SCF energy in gas: -1398.893649 a.u.

M06/BSII SCF energy in gas: -1398.296907 a.u.

M06/BSII free energy in gas: -1397.971917 a.u.

|   |             |            |             |
|---|-------------|------------|-------------|
| C | -2.09436200 | 1.71062300 | -2.39666200 |
| C | -0.87071900 | 1.70418400 | -2.99752400 |
| C | -0.74992700 | 3.02644600 | -1.21905400 |
| N | -1.99396600 | 2.54022000 | -1.29244900 |
| H | -3.00330100 | 1.16092500 | -2.59945100 |
| H | -0.49534800 | 1.17120700 | -3.85594600 |
| H | -0.37083600 | 3.64956100 | -0.41771000 |
| N | -0.04974500 | 2.53856000 | -2.25355400 |
| C | -3.08294200 | 2.84068700 | -0.35099200 |
| H | -3.74861600 | 3.58434700 | -0.79423900 |
| H | -3.63242500 | 1.91350200 | -0.16993700 |
| H | -2.64450500 | 3.22692800 | 0.57081800  |
| C | 1.38315100  | 2.72783400 | -2.49072300 |

|    |             |             |             |
|----|-------------|-------------|-------------|
| H  | 1.72716700  | 3.56025800  | -1.87654300 |
| H  | 1.53619000  | 2.94544100  | -3.54833800 |
| C  | 2.11439700  | 1.42718300  | -2.11195900 |
| O  | 2.37142100  | 1.32565100  | -0.84607800 |
| O  | 2.35457600  | 0.57204500  | -2.96154700 |
| C  | -1.22759900 | -3.38177900 | 2.01896000  |
| C  | -0.25920100 | -3.53514400 | 1.07554500  |
| C  | -2.11901500 | -2.87994000 | 0.05328000  |
| N  | -2.37876700 | -2.97789300 | 1.36237100  |
| H  | -1.18307800 | -3.48404700 | 3.09046000  |
| H  | 0.79036500  | -3.75102100 | 1.18664600  |
| H  | -2.81917600 | -2.48495900 | -0.68241500 |
| N  | -0.83711000 | -3.21757600 | -0.14317300 |
| C  | -3.66822900 | -2.65885400 | 1.98491000  |
| H  | -4.25315800 | -2.06334300 | 1.27919500  |
| H  | -4.19508000 | -3.58149400 | 2.23818500  |
| H  | -3.48414200 | -2.07807500 | 2.89056300  |
| C  | -0.16083700 | -3.24010700 | -1.44135400 |
| H  | -0.81867800 | -2.75691800 | -2.16838100 |
| H  | 0.01039200  | -4.27210000 | -1.75191900 |
| C  | 1.19351600  | -2.50976000 | -1.42701200 |
| O  | 2.11572800  | -2.94596000 | -2.10153900 |
| O  | 1.22789300  | -1.44988200 | -0.66864200 |
| Br | -4.33640100 | -0.61793900 | -1.09608600 |
| Br | -0.16834800 | 3.63288600  | 2.25044000  |
| C  | 0.05238200  | 0.51122300  | 2.45472700  |
| C  | 1.16068000  | 1.44213800  | 1.98751800  |
| H  | -0.41788400 | 0.92982500  | 3.34377900  |
| H  | 1.87113900  | 1.82948300  | 2.70239800  |
| H  | 1.24338500  | 1.75801600  | 0.96332600  |
| C  | -0.97120900 | 0.22116200  | 1.36803600  |
| H  | -1.73909600 | -0.45714400 | 1.74005900  |
| H  | -1.45814300 | 1.14932600  | 1.07392500  |
| H  | -0.48911000 | -0.23038500 | 0.49707400  |
| O  | 0.64280300  | -0.74522300 | 2.90787500  |
| O  | 2.28346400  | -0.08983800 | 1.55957900  |
| C  | 1.75900300  | -1.10271900 | 2.23670300  |
| O  | 2.20542700  | -2.23410700 | 2.26895600  |
| Sn | 3.23384500  | -0.65412400 | -0.43123000 |

**product**

B3LYP-D3/BSI SCF energy in gas: -381.7291259 a.u.

M06/BSII SCF energy in gas: -381.6112474 a.u.

M06/BSII free energy in gas: -381.5384024 a.u.

|   |             |             |             |
|---|-------------|-------------|-------------|
| C | -1.09110200 | -0.10276200 | 0.50463600  |
| C | -0.57618200 | 1.31348600  | 0.18706800  |
| H | -1.58033900 | -0.15185600 | 1.48106200  |
| H | -0.46804000 | 1.93330200  | 1.08413400  |
| H | -1.18815500 | 1.83949900  | -0.54929100 |

|   |             |             |             |
|---|-------------|-------------|-------------|
| C | -1.97019700 | -0.70308000 | -0.58239700 |
| H | -2.16192000 | -1.75891100 | -0.37679900 |
| H | -2.92795900 | -0.17455100 | -0.63045500 |
| H | -1.47714300 | -0.62157800 | -1.55642400 |
| O | 0.13998700  | -0.85022700 | 0.60517600  |
| O | 0.71938400  | 1.07298900  | -0.37636100 |
| C | 1.14274300  | -0.17328600 | -0.01928200 |
| O | 2.23712800  | -0.60676900 | -0.22786200 |

- [1] (a) Noodleman, L.; Lovell, T.; Han, W.-G.; Li, J.; Himo, F. Quantum Chemical Studies of Intermediates and Reaction Pathways in Selected Enzymes and Catalytic Synthetic Systems. *Chem. Rev.* **2004**, *104*, 459-508; (b) Noodleman, L. Valence bond description of antiferromagnetic coupling in transition metal dimers. *J. Chem. Phys.* **1981**, *74*, 5737-5743; (c) Noodleman, L.; Case, D. A. Density-Functional Theory of Spin Polarization and Spin Coupling in Iron—Sulfur Clusters. *Adv. Inorg. Chem.* **1992**, *38*, 423-458.
- [2] Grimme, S.; Antony, J.; Ehrlich, S.; Krieg, H. A consistent and accurate ab initio parametrization of density functional dispersion correction (DFT-D) for the 94 elements H-Pu. *J. Chem. Phys.* **2010**, *132*, 154104.
- [3] (a) Dolg, M.; Wedig, U.; Stoll, H.; Preuss, H. Energy-adjusted ab initio pseudopotentials for the first row transition elements. *J. Chem. Phys.* **1987**, *86*, 866-872; (b) Roy, L. E.; Hay, P. J.; Martin, R. L. Revised Basis Sets for the LANL Effective Core Potentials. *J. Chem. Theory. Comput.* **2008**, *4*, 1029-1031.
- [4] (a) Zhao, Y.; Truhlar, D. G. Benchmark Energetic Data in a Model System for Grubbs II Metathesis Catalysis and Their Use for the Development, Assessment, and Validation of Electronic Structure Methods. *J. Chem. Theory Comput.* **2009**, *5*, 324-333; (b) Zhao, Y.; Truhlar, D. G. The M06 suite of density functionals for main group thermochemistry, thermochemical kinetics, noncovalent interactions, excited states, and transition elements: two new functionals and systematic testing of four M06-class functionals and 12 other functionals. *Theor. Chem. Acc.* **2008**, *120*, 215-241; (c) Zhao, Y.; Truhlar, D. G. Density Functionals with Broad Applicability in Chemistry. *Acc. Chem. Res.* **2008**, *41*, 157-167.
- [5] Fukui, K. The Path of Chemical Reactions —The IRC Approach. *Acc. Chem. Res.* **1981**, *14*, 363-368.
- [6] Frisch, M. J.; Trucks, G. W.; Schlegel, H. B.; Scuseria, G. E.; Robb, M. A.; Cheeseman, J. R.; Scalmani, G.; Barone, V.; Mennucci, B.; Petersson, G. A.;

Nakatsuji, H.; Caricato, M.; Li, X.; Hratchian, H. P.; Izmaylov, A. F.; Bloino, J.; Zheng, G.; Sonnenberg, J. L.; Hada, M.; Ehara, M.; Toyota, K.; Fukuda, R.; Hasegawa, J.; Ishida, M.; Nakajima, T.; Honda, Y.; Kitao, O.; Nakai, H.; Vreven, T.; Montgomery, J. A., Jr.; Peralta, J. E.; Ogliaro, F.; Bearpark, M.; Heyd, J. J.; Brothers, E.; Kudin, K. N.; Staroverov, V. N.; Keith, T.; Kobayashi, R.; Normand, J.; Raghavachari, K.; Rendell, A.; Burant, J. C.; Iyengar, S. S.; Tomasi, J.; Cossi, M.; Rega, N.; Millam, J. M.; Klene, M.; Knox, J. E.; Cross, J. B.; Bakken, V.; Adamo, C.; Jaramillo, J.; Gomperts, R.; Stratmann, R. E.; Yazyev, O.; Austin, A. J.; Cammi, R.; Pomelli, C.; Ochterski, J. W.; Martin, R. L.; Morokuma, K.; Zakrzewski, V. G.; Voth, G. A.; Salvador, P.; Dannenberg, J. J.; Dapprich, S.; Daniels, A. D.; Farkas, O.; Foresman, J. B.; Ortiz, J. V.; Cioslowski, J.; Fox, D. J. Gaussian 09, Rev. A.01; Gaussian, Inc.: Wallingford, CT, 2010.

- [7] Legault, C. Y. CYLView, version 1.0 b; Université de Sherbrooke: Sherbrooke, Quebec, Canada, 2009. <http://www.cylview.org>.
- [8] Y. Hu, Z. Gao, H. Wang, L. Yang, J. Zhang, J. Sun, One-step condensation synthesis of di-tertiary ammonium salt protic ionic liquid for efficiently catalytic CO<sub>2</sub> cycloaddition reaction under cocatalyst- and solvent-free conditions, *Journal of Molecular Liquids*, 416 (2024).
- [9] S. Li, Y. Liu, L. Lin, M. Pudukudy, C. Zhang, W. Zhao, T. Hu, Z. Hui, Y. Zhi, S. Shan, Synergistic effects of multiple functionalities in a modified triazine-based organic polymer for enhanced CO<sub>2</sub> cycloaddition with epoxides, *Fuel*, 385 (2025).
- [10] H. Du, Y. Ye, P. Xu, J. Sun, Experimental and theoretical study on dicationic imidazolium derived poly(ionic liquid)s for catalytic cycloaddition of CO<sub>2</sub>-epoxide, *Journal of CO<sub>2</sub> Utilization*, 67 (2023).
- [11] Q. Wen, X. Yuan, Q. Zhou, H.-J. Yang, Q. Jiang, J. Hu, C.-Y. Guo, Solvent-Free Coupling Reaction of Carbon Dioxide and Epoxides Catalyzed by Quaternary Ammonium Functionalized Schiff Base Metal Complexes under Mild Conditions, *Materials*, 16 (2023).
- [12] Y. Wu, A. Chen, X. Liu, J. Xu, Y. Wang, K. Mumford, G.W. Stevens, W. Fei, Kinetic study of highly efficient CO<sub>2</sub> fixation into propylene carbonate using a continuous-flow reactor, *Chemical Engineering and Processing - Process*

Intensification, 159 (2021).

- [13] Y. Cui, X. Wang, L. Dong, Y. Liu, S. Chen, J. Zhang, X. Zhang, Tunable and functional phosphonium-based deep eutectic solvents for synthesizing of cyclic carbonates from CO<sub>2</sub> and epoxides under mild conditions, *Journal of CO<sub>2</sub> Utilization*, 70 (2023).
- [14] M. Liu, B. Liu, S. Zhong, L. Shi, L. Liang, J. Sun, Kinetics and Mechanistic Insight into Efficient Fixation of CO<sub>2</sub> to Epoxides over N-Heterocyclic Compound/ZnBr<sub>2</sub> Catalysts, *Industrial & Engineering Chemistry Research*, 54 (2015) 633-640.
- [15] J. Peng, S. Wang, H.-J. Yang, B. Ban, Z. Wei, L. Wang, B. Lei, Highly efficient fixation of carbon dioxide to cyclic carbonates with new multi-hydroxyl bis-(quaternary ammonium) ionic liquids as metal-free catalysts under mild conditions, *Fuel*, 224 (2018) 481-488.
